# Supplementary material
Source: PubMed Central journal article supplement (PMC5460715)
Supplement: CJN.11631116SupplementaryData.pdf [file CJN.11631116SupplementaryData.pdf]

Supplemental material is neither peer-reviewed nor thoroughly edited by CJASN. The authors alone are responsible for the accuracy and presentation of the material.

**Supplemental Table 1.** Health State Probabilities for Arteriovenous Fistula Markov Models

|                                   | 65-69 age group |           | 70-74 age group |           | 75-79 age group |           | 80-84 age group |           | 85-89 age group |           |
|-----------------------------------|-----------------|-----------|-----------------|-----------|-----------------|-----------|-----------------|-----------|-----------------|-----------|
| Health States                     | 8 months        | 60 months |
| <b>75<sup>th</sup> percentile</b> |                 |           |                 |           |                 |           |                 |           |                 |           |
| <b>AVG</b>                        | 48.1%           | 11.2%     | 46.5%           | 9.3%      | 43.8%           | 6.7%      | 39.2%           | 3.7%      | 32.2%           | 1.3%      |
| <b>CVC</b>                        | 41.3%           | 34.7%     | 39.2%           | 25.2%     | 35.5%           | 14.1%     | 29.9%           | 5.2%      | 21.8%           | 0.9%      |
| <b>Death</b>                      | 10.6%           | 54.2%     | 14.3%           | 65.5%     | 20.7%           | 79.2%     | 30.9%           | 91.1%     | 46.0%           | 97.8%     |
| <b>50<sup>th</sup> percentile</b> |                 |           |                 |           |                 |           |                 |           |                 |           |
| <b>AVG</b>                        | 46.5%           | 9.2%      | 43.6%           | 6.5%      | 38.9%           | 3.5%      | 31.0%           | 1.1%      | 16.7%           | ----      |
| <b>CVC</b>                        | 39.0%           | 24.8%     | 35.3%           | 13.5%     | 29.4%           | 4.8%      | 20.6%           | 0.7%      | 7.3%            | ----      |
| <b>Death</b>                      | 14.5%           | 66.0%     | 21.1%           | 80.0%     | 31.7%           | 91.7%     | 48.4%           | 98.2%     | 76.0%           | 100%      |
| <b>25<sup>th</sup> percentile</b> |                 |           |                 |           |                 |           |                 |           |                 |           |
| <b>AVG</b>                        | 41.1%           | 4.8%      | 35.7%           | 2.2%      | 26.3%           | 0.4%      | 17.2%           | ----      | 4.2%            | ----      |
| <b>CVC</b>                        | 32.2%           | 7.9%      | 25.7%           | 2.3%      | 15.7%           | 0.2%      | 7.8%            | ----      | 0.7%            | ----      |
| <b>Death</b>                      | 26.7%           | 87.3%     | 38.6%           | 95.5%     | 58.0%           | 99.4%     | 75%             | 100%      | 95.1%           | 100%      |

Abbreviations: AVF, arteriovenous fistula; AVG, arteriovenous graft; CVC, central venous catheter.

Data shown is probability of AVF use, CVC use, or death at 8 months (after up to two attempts at AVF placement) and 60 months after dialysis initiation for all age and life expectancy groups. Cells with dashes indicate values approaching 0%.

Supplemental material is neither peer-reviewed nor thoroughly edited by CJASN. The authors alone are responsible for the accuracy and presentation of the material.

**Supplemental Table 2.** Health State Probabilities for Arteriovenous Graft Markov Models

|                                   | 65-69 age group |           | 70-74 age group |           | 75-79 age group |           | 80-84 age group |           | 85-89 age group |           |
|-----------------------------------|-----------------|-----------|-----------------|-----------|-----------------|-----------|-----------------|-----------|-----------------|-----------|
| Health States                     | 3 months        | 60 months |
| <b>75<sup>th</sup> percentile</b> |                 |           |                 |           |                 |           |                 |           |                 |           |
| <b>AVG</b>                        | 53.5%           | 7.0%      | 52.9%           | 5.5%      | 39.3%           | 3.6%      | 49.8%           | 1.6%      | 46.4%           | 0.4%      |
| <b>CVC</b>                        | 42.1%           | 35.5%     | 41.1%           | 25.4%     | 51.8%           | 13.7%     | 36.3%           | 4.6%      | 31.3%           | 0.7%      |
| <b>Death</b>                      | 4.4%            | 57.5%     | 6.0%            | 69.1%     | 8.9%            | 82.7%     | 13.9%           | 93.8%     | 22.2%           | 98.9%     |
| <b>50<sup>th</sup> percentile</b> |                 |           |                 |           |                 |           |                 |           |                 |           |
| <b>AVG</b>                        | 52.9%           | 5.5%      | 51.7%           | 3.4%      | 49.7%           | 1.5%      | 45.8%           | 0.3%      | 36.3%           | ----      |
| <b>CVC</b>                        | 41.0%           | 24.9%     | 39.1%           | 13.1%     | 36.0%           | 4.2%      | 30.5%           | 0.5%      | 18.6%           | ----      |
| <b>Death</b>                      | 6.1%            | 69.6%     | 9.2%            | 83.5%     | 14.3%           | 94.3%     | 23.7%           | 99.2%     | 45.1%           | 100%      |
| <b>25<sup>th</sup> percentile</b> |                 |           |                 |           |                 |           |                 |           |                 |           |
| <b>AVG</b>                        | 50.6%           | 2.3%      | 48.1%           | 0.8%      | 43.1%           | 0.1%      | 44.1%           | ----      | 20.6%           | ----      |
| <b>CVC</b>                        | 37.5%           | 7.3%      | 33.9%           | 1.9%      | 26.9%           | 0.1%      | 36.8%           | ----      | 4.9%            | ----      |
| <b>Death</b>                      | 11.9%           | 90.4%     | 18.0%           | 97.3%     | 30.0%           | 99.8%     | 19.1%           | 100%      | 74.4%           | 100%      |

Abbreviations: AVF, arteriovenous fistula; AVG, arteriovenous graft; CVC, central venous catheter.

Data shown is probability of using AVG for hemodialysis, CVC use (before AVG can be used or after AVG experiences compromised patency or infection), or death at 3 months (after up to two attempts at AVG placement) and 60 months after dialysis initiation for all age and life expectancy groups. Cells with dashes indicate values approaching 0%.

Supplemental material is neither peer-reviewed nor thoroughly edited by CJASN. The authors alone are responsible for the accuracy and presentation of the material.

**Supplemental Figure 1. Cost-Effectiveness Acceptability Curves**

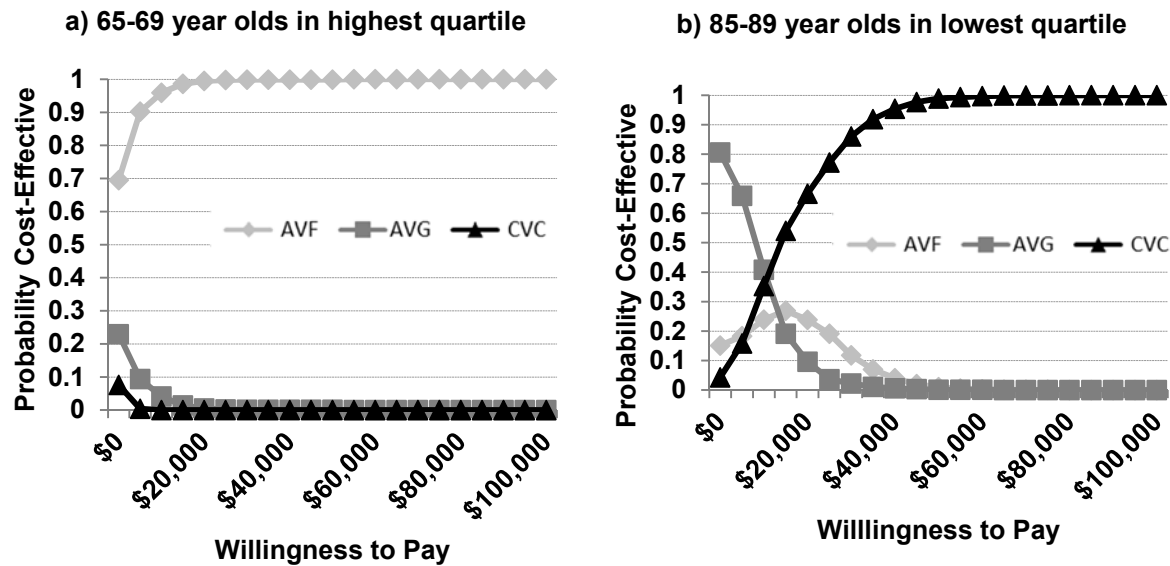

Cost-effectiveness acceptability curve for AVF placement, AVG placement, or continued CVC use in the 65-69 year old age group in the highest quartile of life-expectancy (a) and the 85-89 year old age group in the lowest quartile of life-expectancy (b). Willingness-to-pay represents the amount of dollars society is willing to pay for 1 quality adjusted life year. The probability that the incremental cost-effectiveness ratio is at or below the willingness-to-pay threshold is on the Y axis.
